# Supplementary material for: Increased circulating TREM2+ microglial extracellular vesicles in aged APP/PS1 Alzheimer’s disease rats
Source: Research Square preprint supplement (doi:10.21203/rs.3.rs-6883456/v1), 2025-06-18
Supplement: Supplementary file 1 [file 460a5adb279a5802c597642e.docx]

**Table S1: Primer sequences used for qPCR experiments**

| **Gene** | **Forward Primer** | **Reverse Primer** |
| --- | --- | --- |
| Rpl13⍺ | GCTGTGAGGGCATCAACATT | TTGGTGTTCATCCGCTTTCG |
| β-actin | GGCACCACACCTTCTACAATG | GGGGTGTTGAAGGTCTCAAAC |
| TMEM119 | TCCTTTTCCCAGAGCTGGTTC | GAAGAACCCTCAGCTTCCCC |
| TREM2 | AACTTCAGATCCTCACTGGACC | ATTGGATTGGCTCCTGGCTG |

**Figure S1: Nanoflow detection of TMEM119, TREM2, and standardized beads in rat plasma.** A-B) Scatter plots of silicon beads (180 nm, 240 nm, 300 nm, 590 nm, and 880 nm) and 488-conjugated polystyrene beads (100 nm and 500 nm). C) Scatter plot of total plasma EVs. D-F) PBS in 647-, 405, and dual-gated channels. G-I) Plasma in 647-, 405-, and dual-gated channels. J-L) Plasma + TMEM119-647 antibody in 647-, 405-, and dual-gated channels. M-O) Plasma + TREM2-405 in 647-, 405-, and dual-gated channels. LALS, long angle light scatter; SALS, short angle light scatter.

**
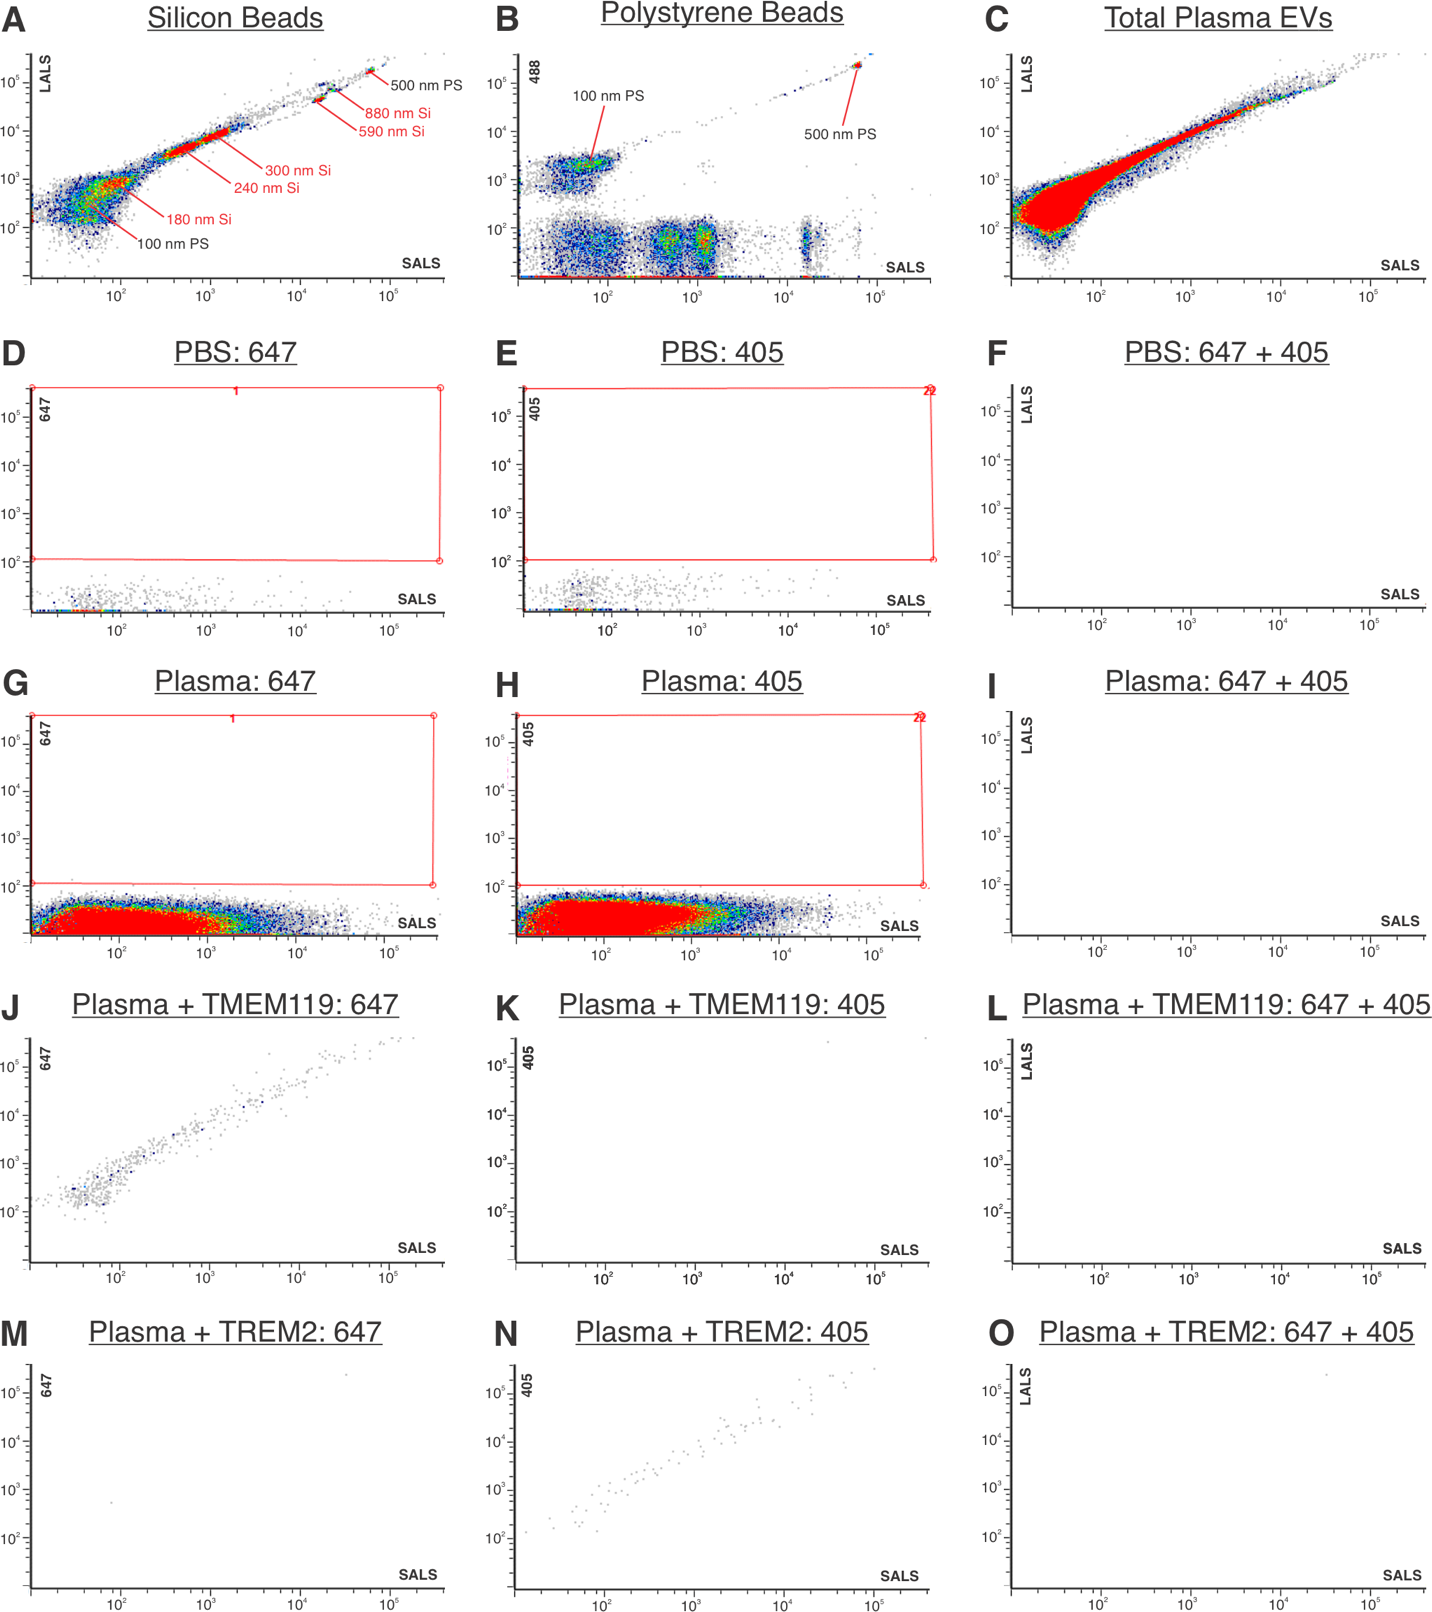
**

**Figure S2: Hippocampus western blot imaging files**

**
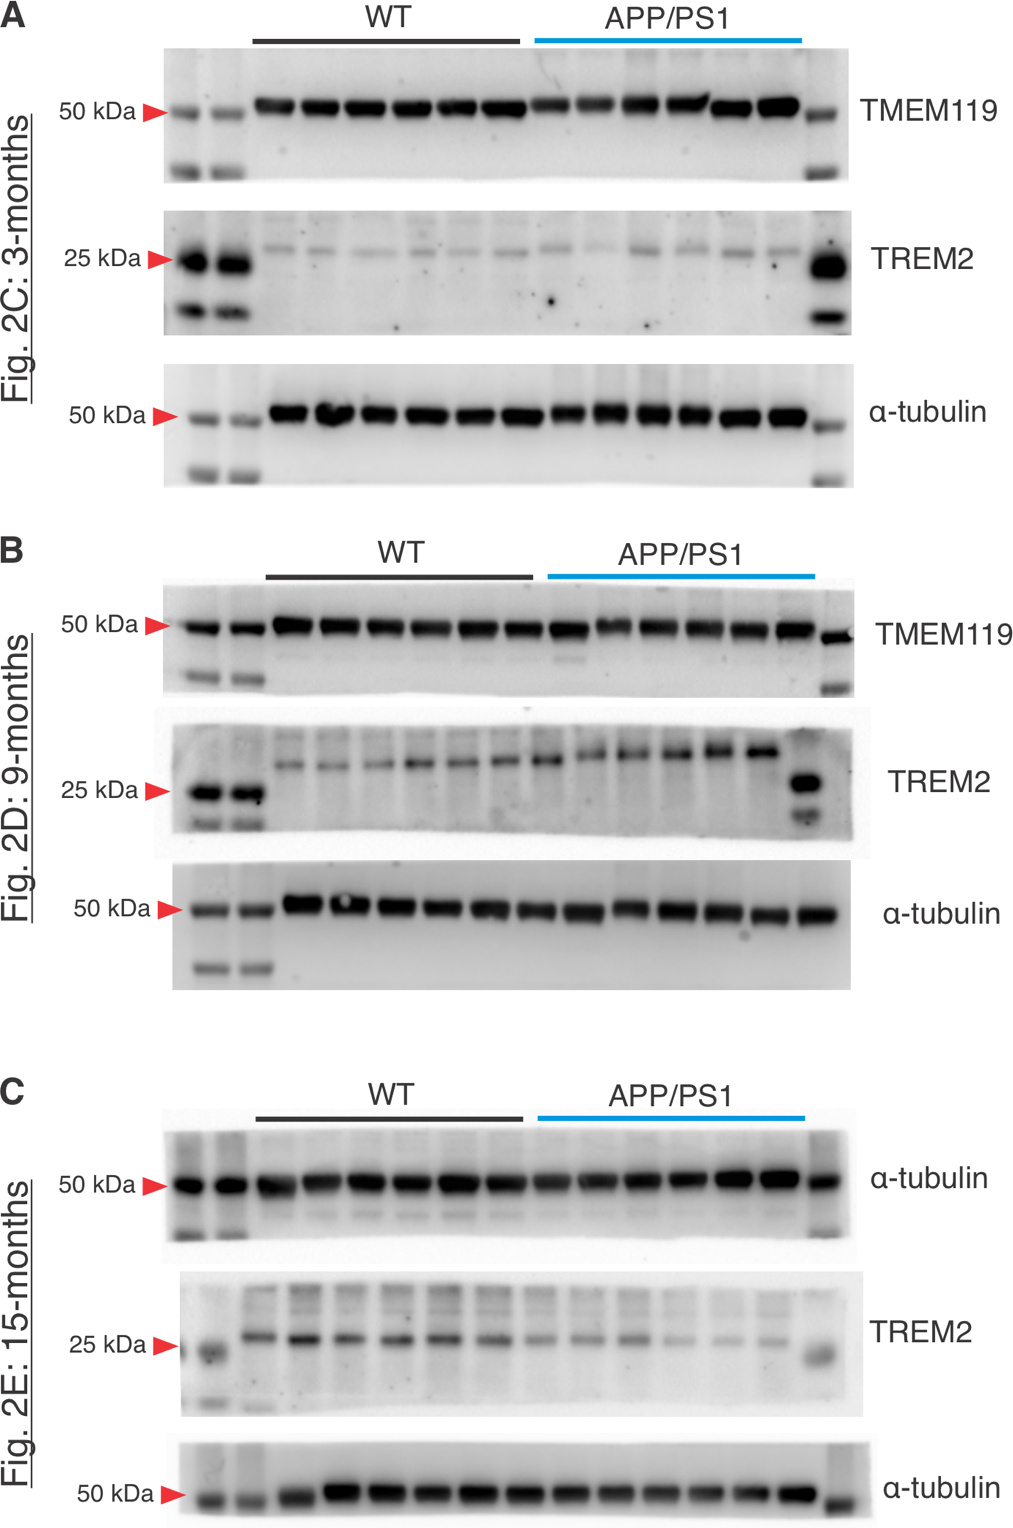
**

**Figure S3: Corpus callosum western blot imaging files**

**
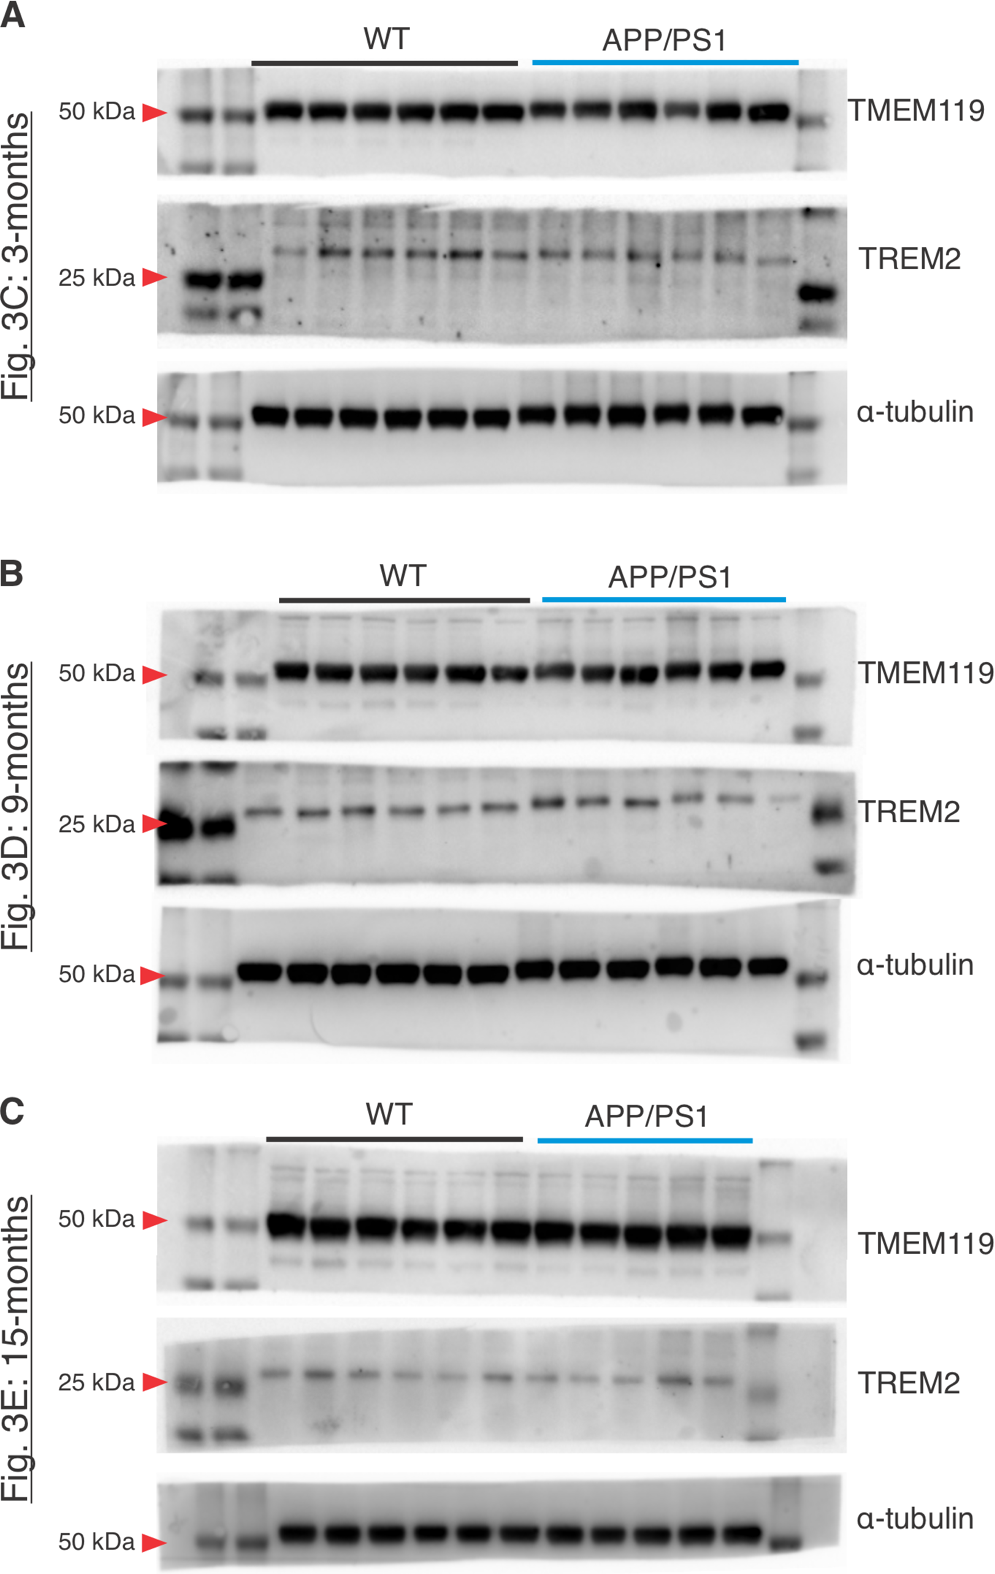
**

**Figure S4: EV isolation western blot imaging files**

**
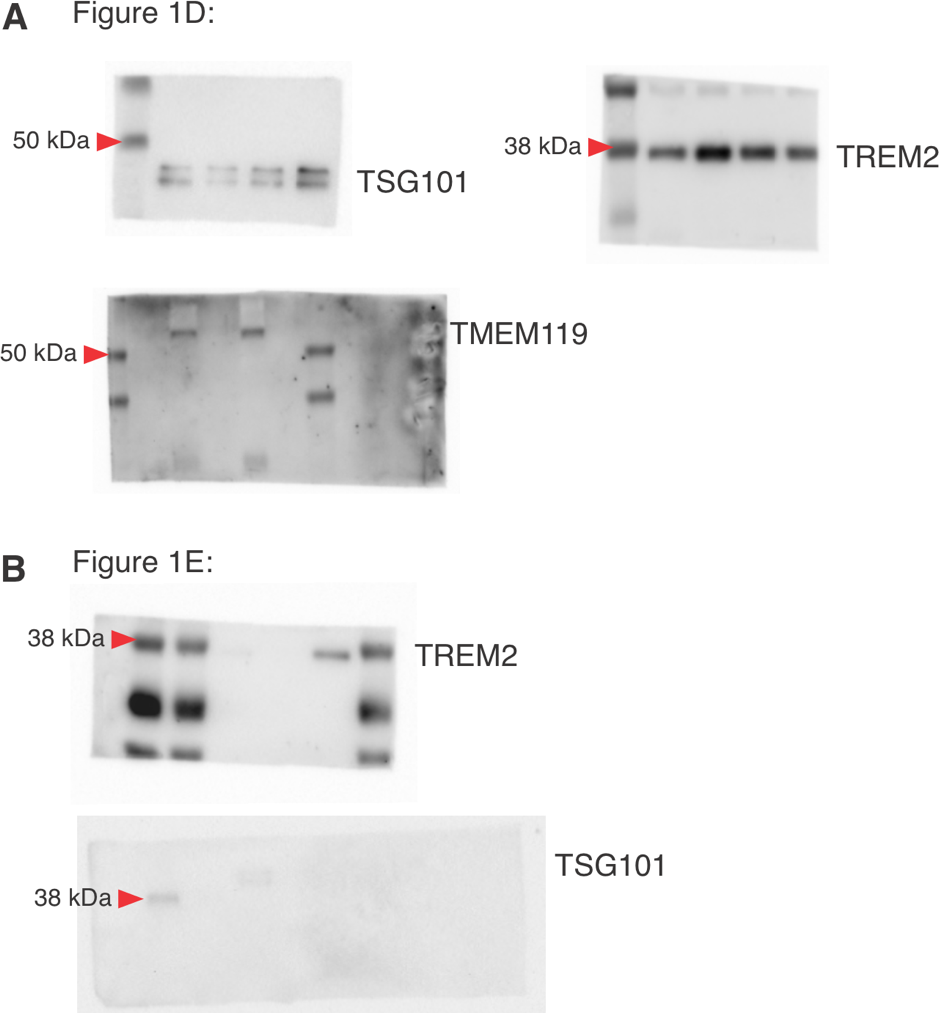
**

**Figure S5: Discrimination of wildtype from APP/PS1 rats using TMEM119+/TREM2+ EVs.** Receiver operating characteristic (ROC) curves of 3-, 9-, and 15-month rats and area under the curve (AUC) values.

**
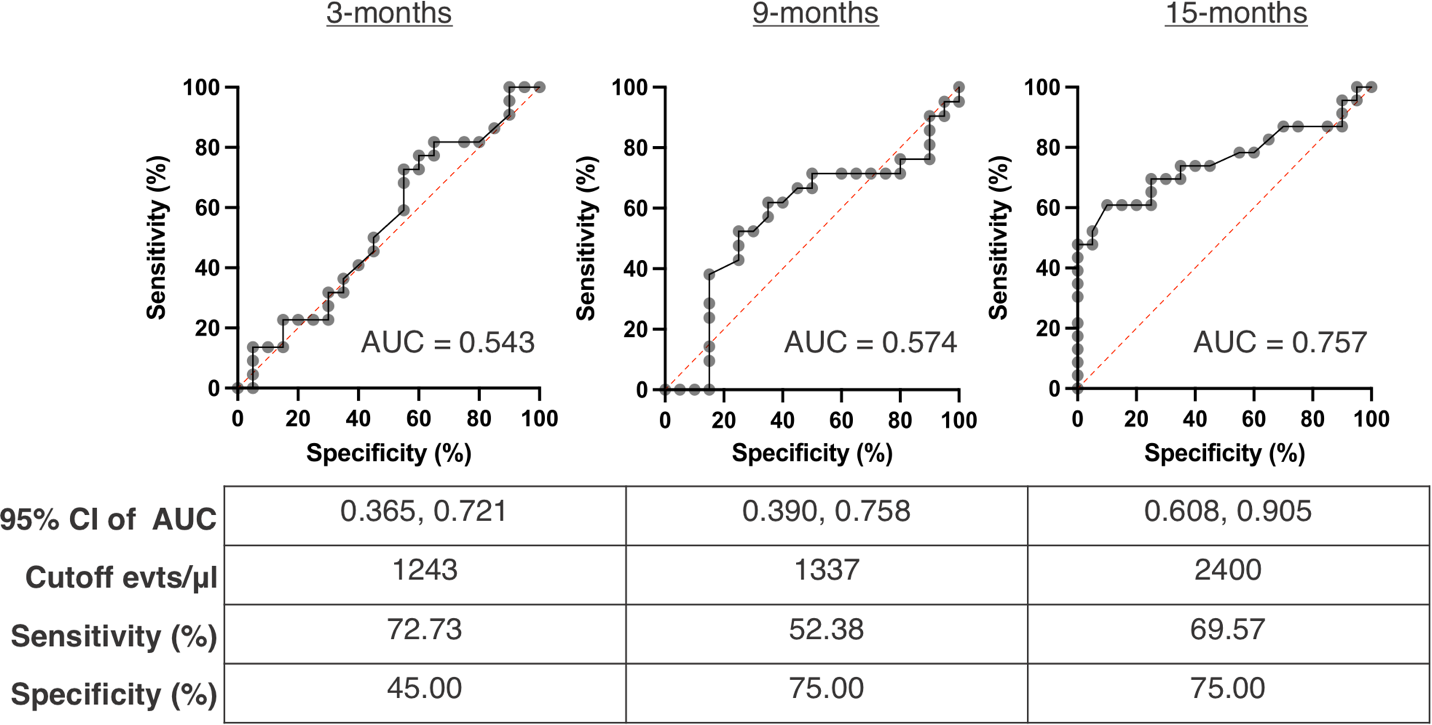
**

**Figure S6: Immunohistochemistry of 82E1 for amyloid deposition** **in 3-, 9-, and 15-month APP/PS1 rats.** A-C) Left panel images are 10 ✕ stitches of the hippocampus (scale bar indicates 500 µm) and right panel images are 20 ✕ captures of the outlined area (scale bar indicates 50 µm) in A) 3-month, B), 9-month, and C) 15-month APP/PS1 rats. D) Image taken at 40 ✕ magnification depicting amyloid plaque (scale bar indicates 25 µm).

**
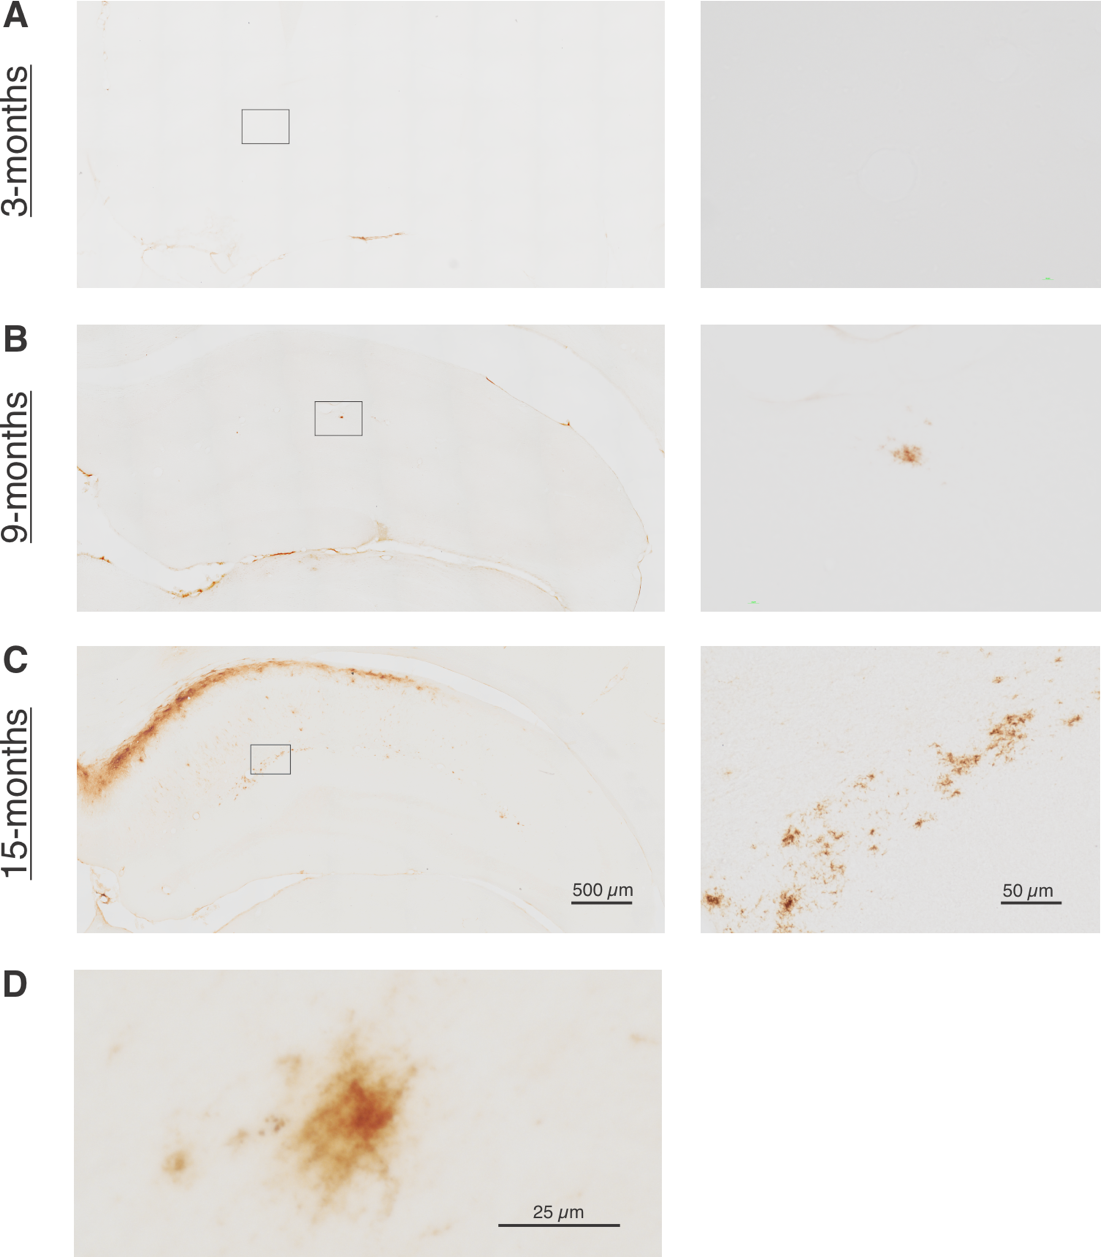
**
